# Supplementary material
Source: PubMed Central journal article supplement (PMC5924655)

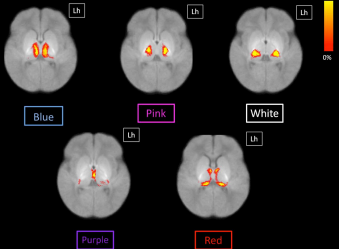

CHD 1

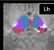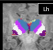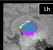

CHD 2

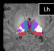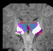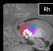

CHD 3

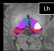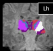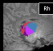

CHD 4

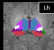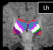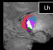

CHD 5

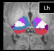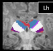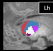

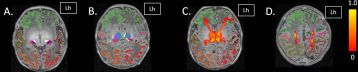

Blue

Pink

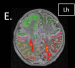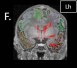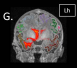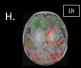

White

Purple

Red

Green

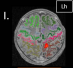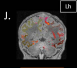

Orange

Orange

K=3

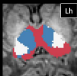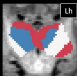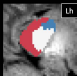

K=5

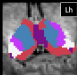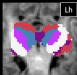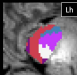

K=7

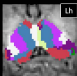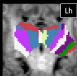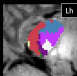

Supplement: NIHMS915187-supplement-Supp_FigS1-4.pdf [file NIHMS915187-supplement-Supp_FigS1-4.pdf]
